# Supplementary material for: NiFe layered double hydroxide with intercalated fluorosilicate anions for industrial-level alkaline seawater oxidation
Source: Royal Society of Chemistry journal article supplement (doi:10.1039/d5cy00677e), 2025-01-01
Supplement: d5cy00677e1.pdf [file d5cy00677e1.pdf]

## Electronic Supplementary Information

### Experimental Section

**Materials:** Potassium fluosilicate ( $\text{K}_2\text{SiF}_6$ ), nickel nitrate hexahydrate ( $\text{Ni}(\text{NO}_3)_2 \cdot 6\text{H}_2\text{O}$ ), iron nitrate nonahydrate ( $\text{Fe}(\text{NO}_3)_3 \cdot 9\text{H}_2\text{O}$ ), sodium hydroxide ( $\text{NaOH}$ ), potassium hydroxide ( $\text{KOH}$ ), and N, N-diethyl-p-phenylenediamine (DPD) were sourced from Shanghai Maclin Biochemical Technology Co., Ltd. Ammonium fluoride ( $\text{NH}_4\text{F}$ ), urea ( $\text{CO}(\text{NH}_2)_2$ ), sodium carbonate ( $\text{Na}_2\text{CO}_3$ ), sodium chloride ( $\text{NaCl}$ ), ruthenium oxide ( $\text{RuO}_2$ ), and nafion (5 wt.%) were acquired from Aladdin Ltd. (Shanghai, China). Hydrochloric acid ( $\text{HCl}$ ), potassium permanganate ( $\text{KMnO}_4$ ), sulfuric acid ( $\text{H}_2\text{SO}_4$ ), and ethanol ( $\text{C}_2\text{H}_5\text{OH}$ ) were obtained from the Chengdu Kelong Chemical Reagent Factory. The Ni foam used in this study was bought from Qingyuan Metal Materials Co., Ltd (Xingtai, China). Ultrapure water was used throughout the experiments.

**Preparation of NiFe LDH/NF and  $\text{SiF}_6^{2-}$ -NiFe LDH/NF:** Firstly, NF with a size of  $2.0 \text{ cm} \times 3.0 \text{ cm}$  was sonicated in 3 M  $\text{HCl}$ , ethanol, and deionized water, respectively for 15 min. Meanwhile, 1 mmol  $\text{Fe}(\text{NO}_3)_3 \cdot 9\text{H}_2\text{O}$ , 2 mmol  $\text{Ni}(\text{NO}_3)_2 \cdot 6\text{H}_2\text{O}$ , 1 mmol urea, and 4 mmol  $\text{NH}_4\text{F}$  were mixed with 35 mL of deionized water and stirred for 20 minutes at room temperature to obtain a precursor solution. Subsequently, the precursor solution was transferred into a Teflon-lined autoclave along with the pre-treated NF, the autoclave was sealed and maintained at  $120^\circ\text{C}$  for 6 h in an oven and cooled down to room temperature naturally. Then the as-prepared sample was washed thoroughly with deionized water and ethanol several times and dried at  $60^\circ\text{C}$  for 30 min in air. The final sample obtained was NiFe LDH/NF. The  $\text{SiF}_6^{2-}$ -NiFe LDH/NF was prepared by simple immersion. The NiFe LDH/NF was immersed in 0.05 mM  $\text{K}_2\text{SiF}_6$  aqueous solution for several minutes. After several washes with DI water and drying at  $60^\circ\text{C}$ ,  $\text{SiF}_6^{2-}$ -NiFe LDH/NF was obtained.

**Preparation of  $\text{RuO}_2$ /NF or Pt/C/NF:** An ethanol solution (with a 50/50 vol split of water and ethanol) and an extra 30  $\mu\text{L}$  of Nafion binder were employed to disperse  $\text{RuO}_2$  (or 20% Pt/C) powder for the ink ( $5 \text{ mg mL}^{-1}$ ). The resulting ink in a small

centrifuge tube underwent approximately 30 min of sonication, followed by the pipette transfer of 100  $\mu\text{L}$  of the ink dropwise onto a cleaned NF. The electrode was then fabricated after drying.

**Characterizations:** X-ray diffraction (XRD) patterns were acquired on Shimadzu XRD-6100 S2 diffractometer with Cu-K radiation at a scanning speed of  $5^\circ \text{ minute}^{-1}$ . Raman spectroscopy was recorded on the Lab RAM HR Evolution confocal microscope with 532 nm laser. The morphology and structure of the synthesized samples were examined via SEM (Zeiss Gemini SEM 300) and TEM (FEI TF200). Chemical compositions and element distributions were analyzed using the ESCALABMK II X-ray photoelectron spectrometer system and EDX mapping. Absorbance measurements were conducted with a UV-vis spectrophotometer (Shimadzu UV-2700). The elemental composition was determined by Inductively Coupled Plasma-Optical Emission Spectroscopy (ICP-OES, SPECTRO ARCOS II MV, Germany).

**Electrochemical measurements:** All electrochemical experiments were conducted utilizing a CHI660 analyzer (CH Instruments, Inc., Shanghai). The experiments employed the standard three-electrode configuration, a graphite rod acted as the counter electrode, the prepared samples as the working electrode, and an Hg/HgO electrode served as the reference electrode. Linear sweep voltammetry (LSV) curves were obtained over a potential range of 0 to 1.4 V with a scan rate of  $5 \text{ mV s}^{-1}$ . Potentials were standardized to the reversible hydrogen electrode (RHE) scale using the formula:  $E(\text{RHE}) = E(\text{Hg/HgO}) + 0.098 + 0.059 \times \text{pH}$ . The  $iR$ -compensated potential was derived by using the equation:  $E_{\text{corr}} = E - iR$ , with  $E$  being the original potential,  $R$  the solution resistance,  $i$  the current, and  $E_{\text{corr}}$  the  $iR$ -compensated potential. The double-layer capacitance ( $C_{\text{dl}}$ ) values were assessed through cyclic voltammetry (CV) at a scan rate from 20 to  $100 \text{ mV s}^{-1}$  in alkaline freshwater.

**Determination of active chlorine:** UV-vis spectrophotometer was utilized to determine the concentration of active chlorine in the electrolyte through the DPD colorimetric method. After the long-term stability test at  $1000 \text{ mA cm}^{-2}$ , DPD was

added to the electrolyte, causing a pink coloration. UV-vis absorption spectrometry at 550 nm was used to analyze different active chlorine concentrations.

**Computational details:** In our calculations, both the AEM and LOM mechanisms were considered to achieve a better understanding of the oxygen evolution reaction (OER) processes. The analysis of the AEM mechanism proceeded through four steps:

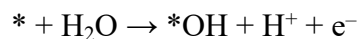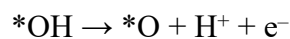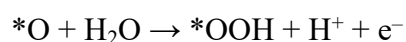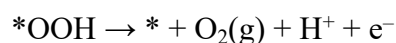

where \* denotes the catalysis surface.

And the LOM mechanism was analyzed through four additional steps:

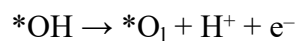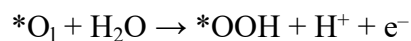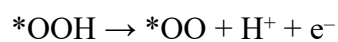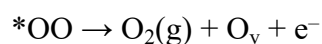

where  $\text{O}_\text{l}$  represents lattice oxygen and  $\text{O}_\text{v}$  represents oxygen vacancy.

The Gibbs free energy change in each step was calculated by:

$$\Delta G = \Delta E + \Delta \text{ZPE} - T\Delta S$$

where  $\Delta G$  is the change of Gibbs free energy.  $\Delta E$  is the change of energy obtained from DFT calculations.  $\Delta \text{ZPE}$  and  $T\Delta S$  are the corrections for zero point energy and entropy, respectively. The theoretical overpotentials ( $\eta$ ) were calculated by:

$$\eta = \Delta G_{\text{max}} - 1.23 \text{ V}$$

where  $\Delta G_{\text{max}}$  is the maximum free energy change in the OER process.

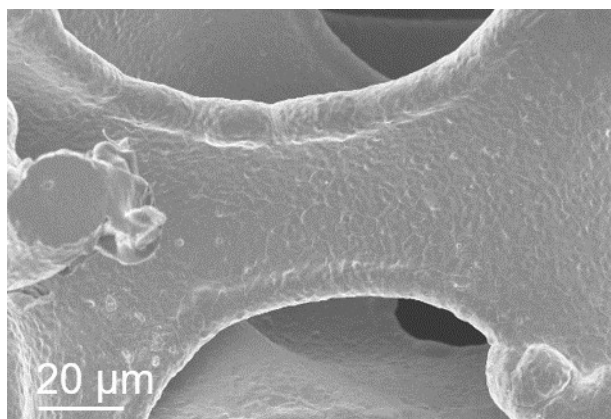

**Fig. S1.** SEM image of bare NF.

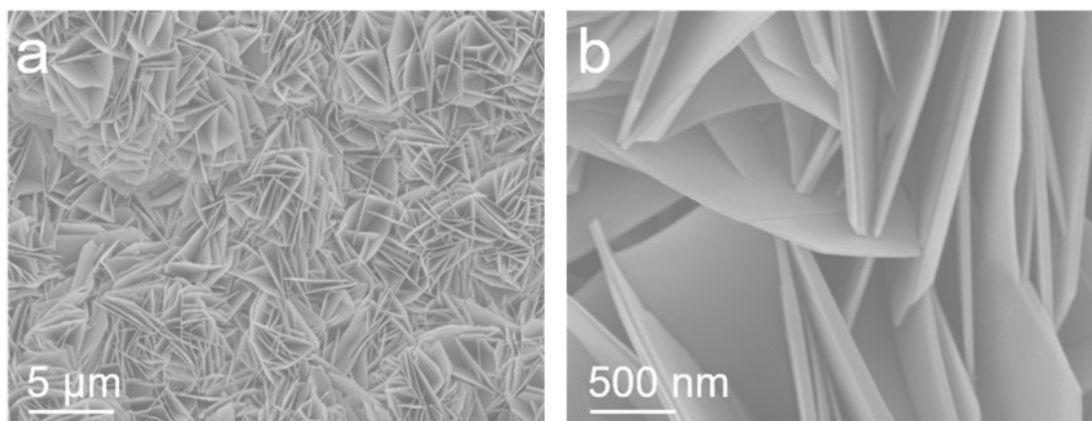

**Fig. S2.** (a) Low- and (b) high-magnification SEM images of NiFe LDH/NF.

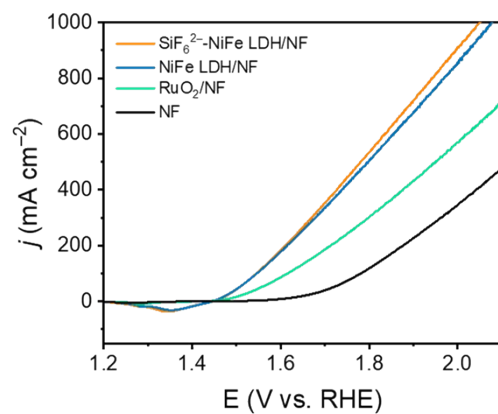

**Fig. S3.** LSV curves of different electrocatalysts in 1 M KOH without iR compensation.

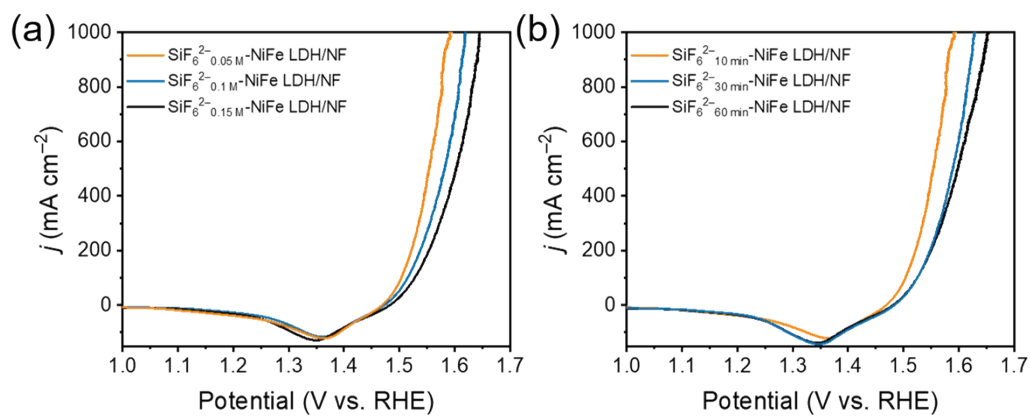

**Fig. S4.** LSV curves of different  $\text{Na}_2\text{SiF}_6$  (a) concentrations and (b) immersion times in 1 M KOH.

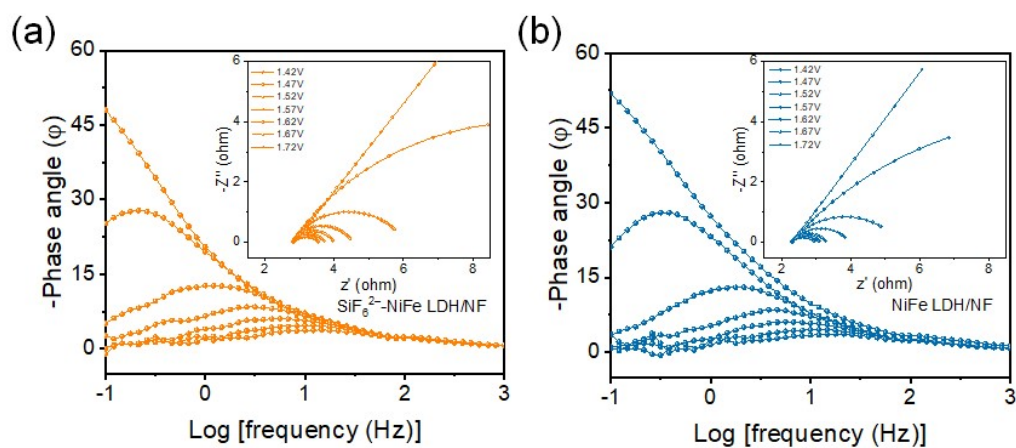

**Fig. S5.** Operando Nyquist plots and the corresponding Bode plots of (a)  $\text{SiF}_6^{2-}$ -NiFe LDH/NF and (b) NiFe LDH/NF at different potential versus RHE.



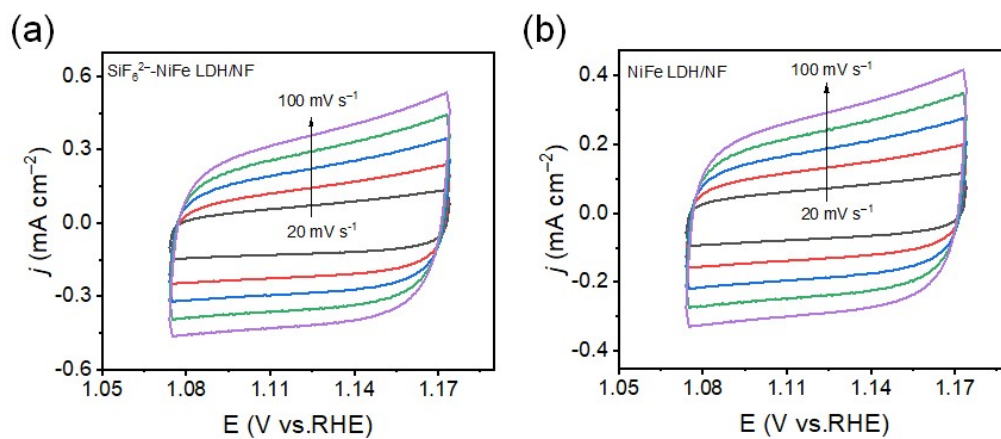

**Fig. S6.** CV curves of (a) SiF<sub>6</sub><sup>2-</sup>-NiFe LDH/NF and (b) NiFe LDH/NF in the double layer region at different scan rates of 20, 40, 60, 80, and 100 mV s<sup>-1</sup> in 1 M KOH.

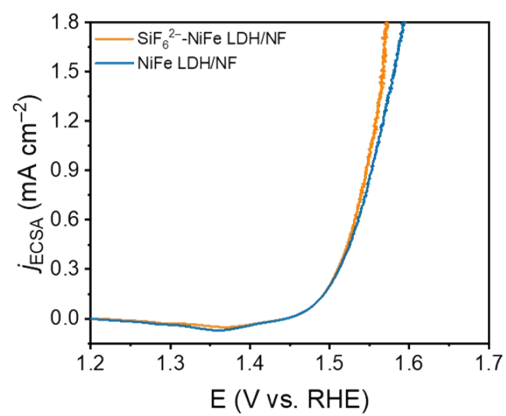

**Fig. S7.** ECSA-normalized LSV curves of SiF<sub>6</sub><sup>2-</sup>-NiFe LDH/NF and NiFe LDH/NF.

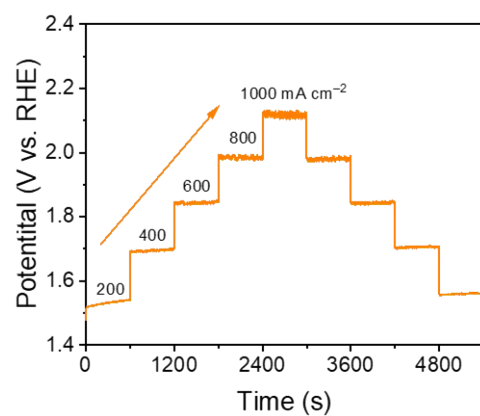

**Fig. S8.** Multistep chronopotentiometric curves of SiF<sub>6</sub><sup>2-</sup>-NiFe LDH/NF without iR correction 1 M KOH.

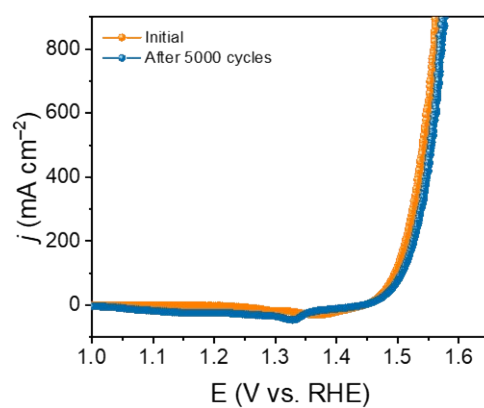

**Fig. S9.** LSV curves of  $\text{SiF}_6^{2-}$ -NiFe LDH/NF before and after 5000 CV cycles in 1 M KOH.

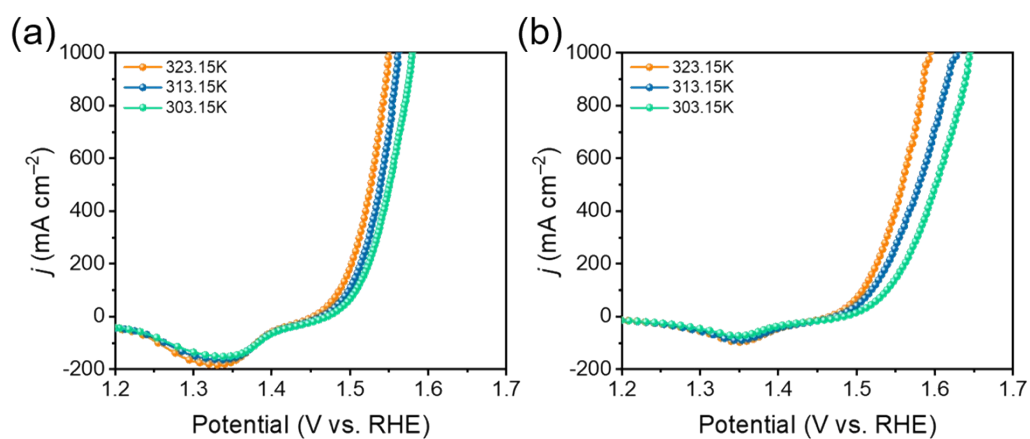

**Fig. S10.** LSV curves of (a) SiF<sub>6</sub><sup>2-</sup>-NiFe LDH/NF and (b) NiFe LDH/NF toward OER at different temperatures.

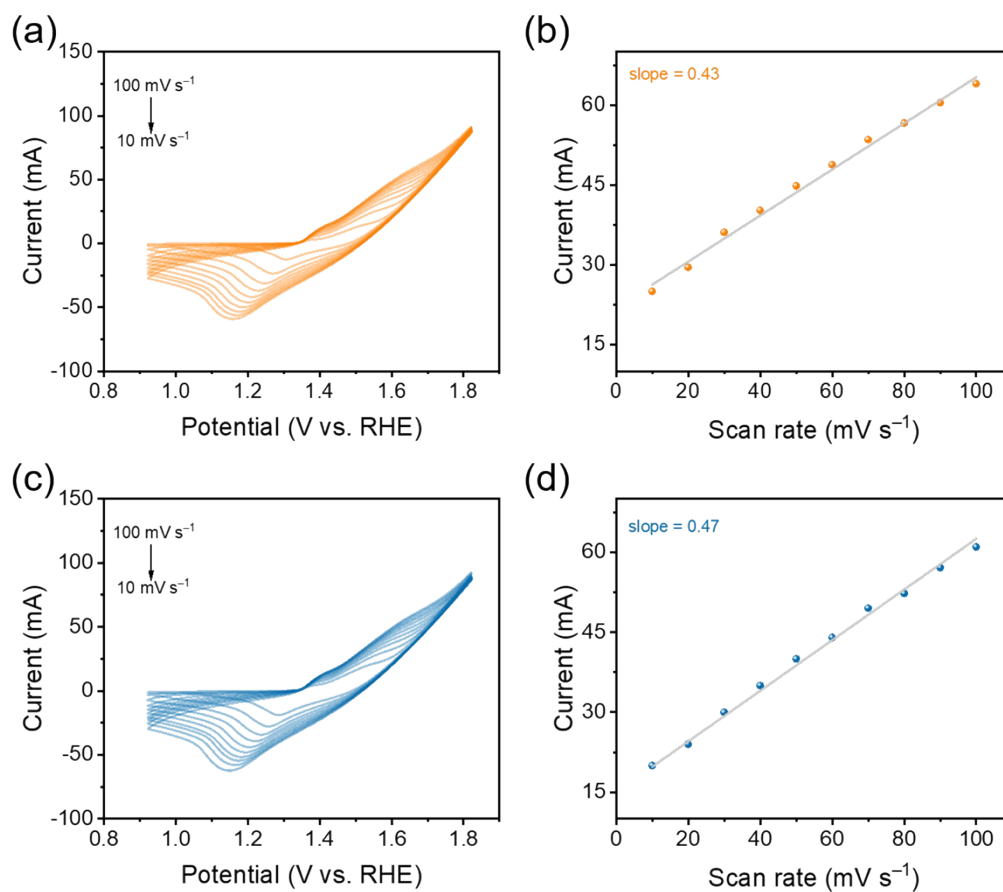

**Fig. S11.** CV curves of (a)  $\text{SiF}_6^{2-}$ -NiFe LDH/NF and (c) NiFe LDH/NF at different scan rates increasing from 10 to 100  $\text{mV s}^{-1}$  in 1 M KOH. Oxidation peak current versus the scan rate plot of (b)  $\text{SiF}_6^{2-}$ -NiFe LDH/NF and (d) NiFe LDH/NF.

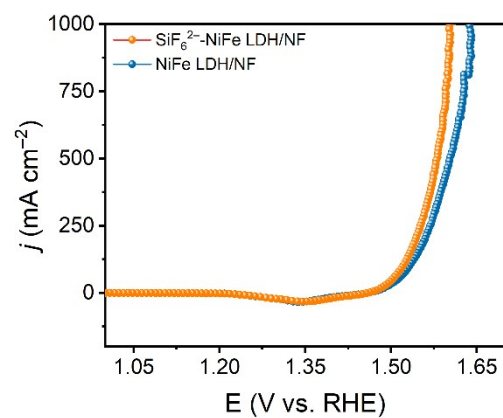

**Fig. S12.** LSV curves of  $\text{SiF}_6^{2-}$ -NiFe LDH/NF and NiFe LDH/NF in 1 M KOH + seawater.

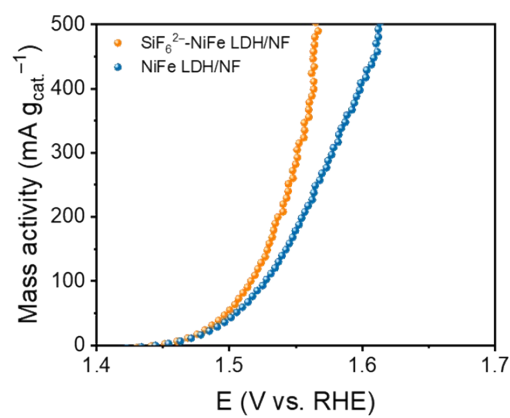

**Fig. S13.** Mass activity curves of SiF<sub>6</sub><sup>2-</sup>-NiFe LDH/NF and NiFe LDH/NF.



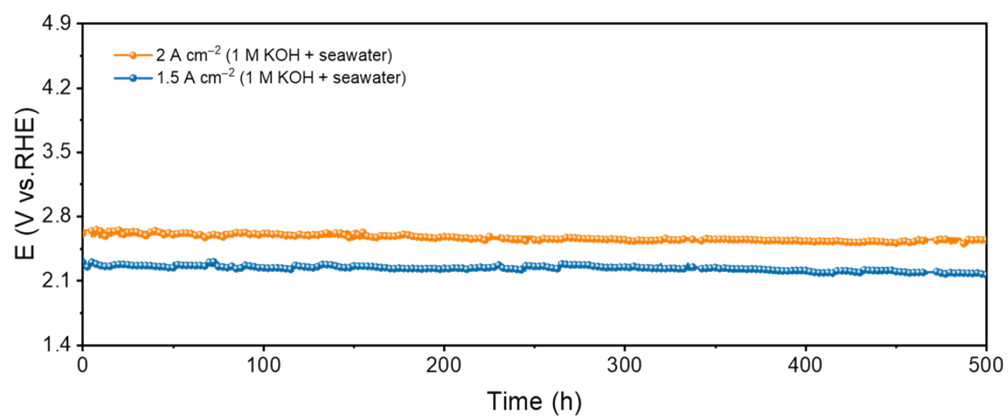

**Fig. S14.** Chronopotentiometry curves of  $\text{SiF}_6^{2-}$ -NiFe LDH/NF at  $1.5$  and  $2 \text{ A cm}^{-2}$  without iR correction in  $1 \text{ M KOH} + \text{seawater}$ .

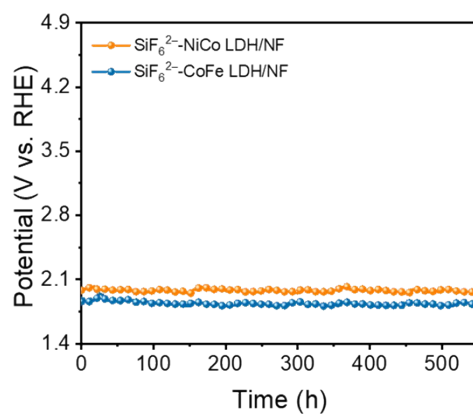

**Figure S15.** Chronopotentiometry curves of SiF<sub>6</sub><sup>2-</sup>-NiCo LDH/NF and SiF<sub>6</sub><sup>2-</sup>-CoFe LDH/NF at 1000 mA cm<sup>-2</sup> without iR correction in 1 M KOH + seawater.

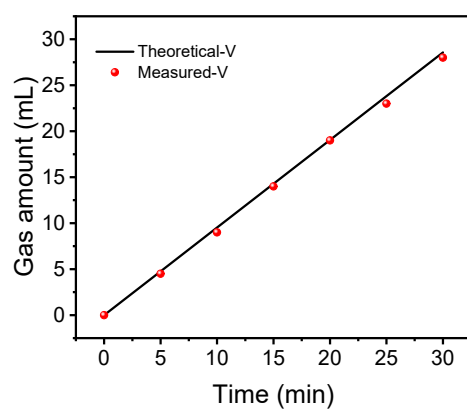

**Fig. S16.** Comparison between the amount of collected and theoretical O<sub>2</sub> for SiF<sub>6</sub><sup>2-</sup>-NiFe LDH/NF at a *j* of 1000 mA cm<sup>-2</sup> in 1 M KOH + seawater.

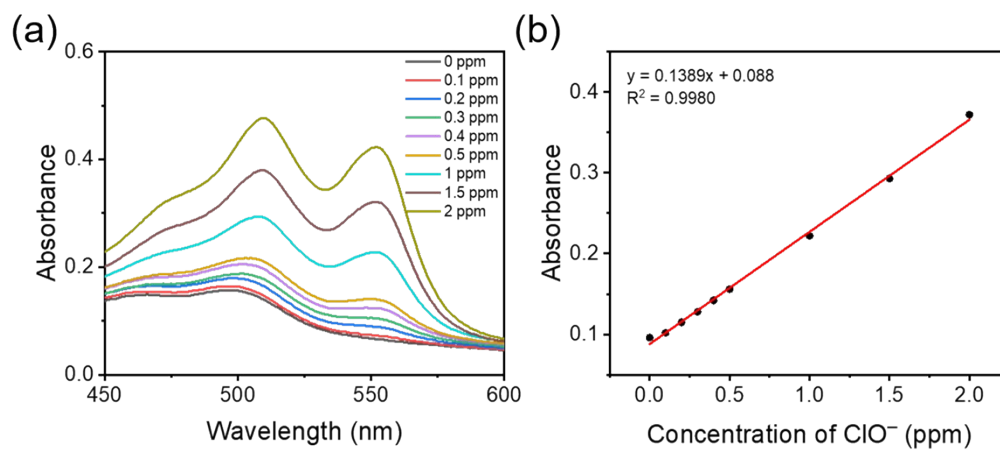

**Fig. S17.** (a) UV-vis absorption spectra of various active chlorine concentrations. (b) Calibration curve was used to evaluate  $\text{ClO}^-$  concentrations of the electrolyte.

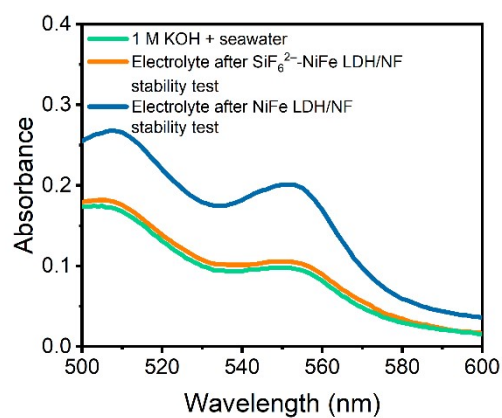

**Fig. S18.** UV-vis absorption spectra of the collected electrolytes from SiF<sub>6</sub><sup>2-</sup>-NiFe LDH/NF and NiFe LDH/NF stability test at 1000 mA cm<sup>-2</sup>.

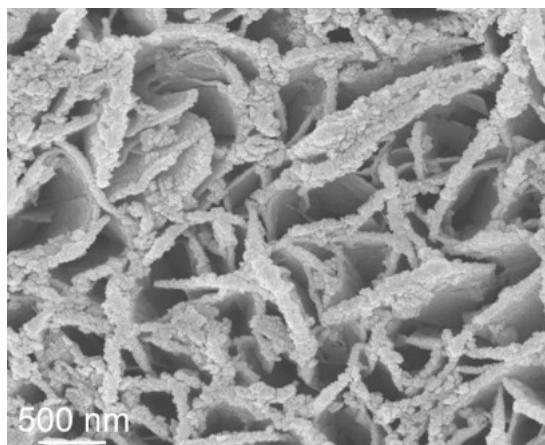

**Fig. S19.** SEM image of SiF<sub>6</sub><sup>2-</sup>-NiFe LDH/NF after durability test in 1 M KOH + seawater.

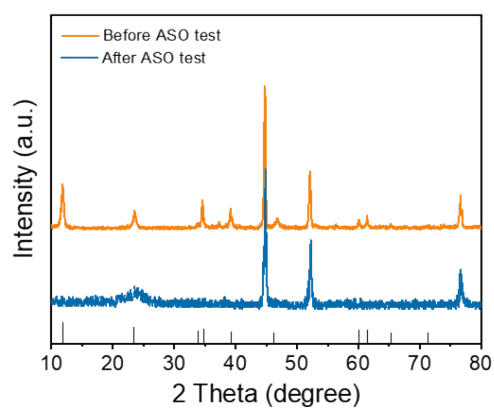

**Fig. S20.** XRD patterns of  $\text{SiF}_6^{2-}$ -NiFe LDH/NF before and after OER stability test in 1 M KOH + seawater.

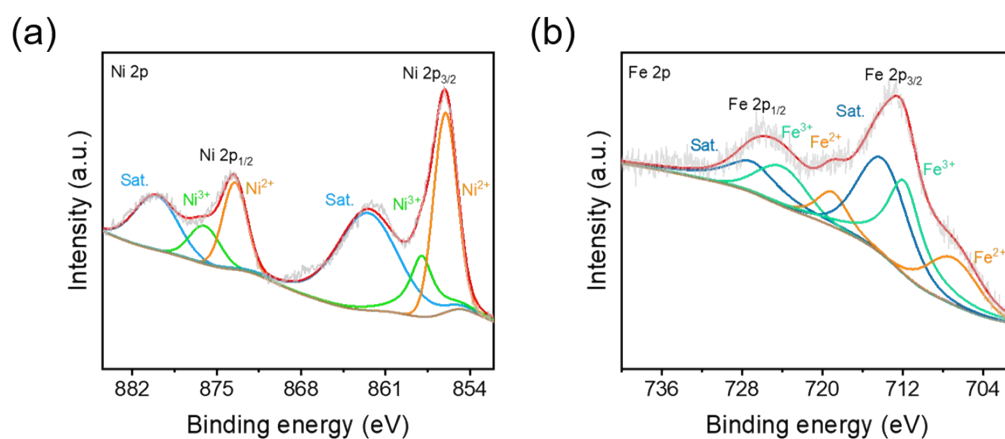

**Fig. S21.** XPS spectra of SiF<sub>6</sub><sup>2-</sup>-NiFe LDH in the (a) Ni 2p and (b) Fe 2p regions after OER stability test in 1 M KOH + seawater.



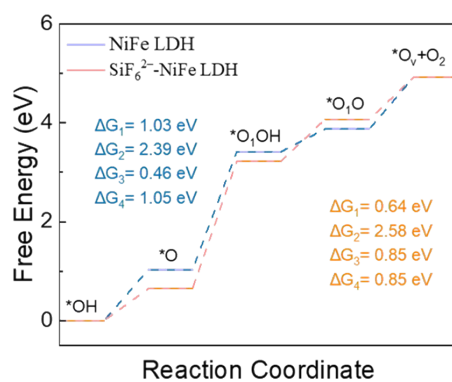

**Fig. S22.** Free energy diagrams of LOM in SiF<sub>6</sub><sup>2-</sup>-NiFe LDH and NiFe LDH.

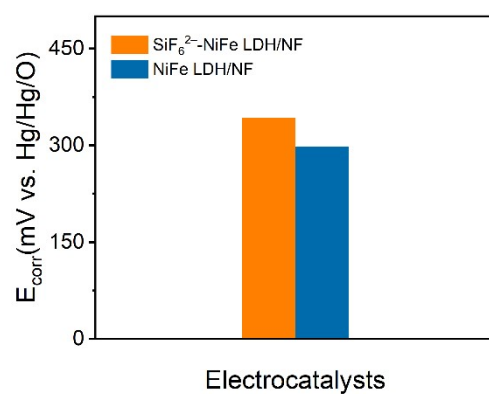

**Fig. S23.** Corrosion potentials of SiF<sub>6</sub><sup>2-</sup>-NiFe LDH/NF and NiFe LDH/NF electrodes in 1 M KOH + seawater.

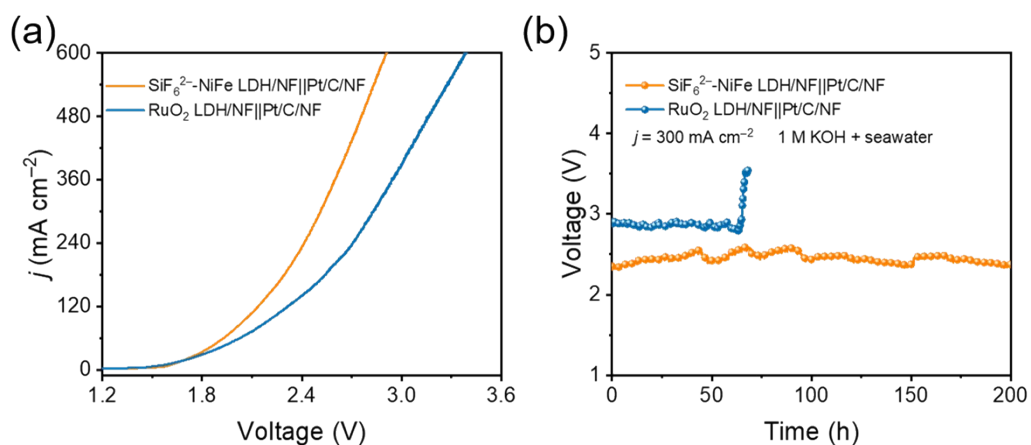

**Fig. S24.** (a) The AEM-based electrolysis performance of SiF<sub>6</sub><sup>2-</sup>-NiFe LDH/NF||Pt/C/NF and RuO<sub>2</sub>/NF||Pt/C/NF pairs in 1 M KOH + seawater. (b) Chronopotentiometry curves of SiF<sub>6</sub><sup>2-</sup>-NiFe LDH/NF||Pt/C/NF and RuO<sub>2</sub>/NF||Pt/C/NF in 1 M KOH + seawater.

**Table S1** EIS parameters of the samples.

| Catalyst                                    | $R_s/\Omega$ | $R_{ct}/\Omega$ |
|---------------------------------------------|--------------|-----------------|
| SiF <sub>6</sub> <sup>2-</sup> -NiFe LDH/NF | 2.22         | 3.28            |
| NiFe LDH/NF                                 | 2.72         | 4.27            |

$R_s$ : solution resistance.

$R_{ct}$ : charge transfer resistance.

**Table S2** Comparison of OER catalytic performance for seawater oxidation of  $\text{SiF}_6^{2-}$ -NiFe LDH/NF with recent reported catalysts.

| Catalysts                                                          | Current Density<br>(mA cm <sup>-2</sup> ) | Overpotential<br>(mV) | Electrolyte        | Ref.      |
|--------------------------------------------------------------------|-------------------------------------------|-----------------------|--------------------|-----------|
| $\text{SiF}_6^{2-}$ -NiFe LDH/NF                                   | 500                                       | 350                   | 1 M KOH + seawater | This work |
|                                                                    | 1000                                      | 371                   | 1 M KOH + seawater |           |
| MnCo/NiSe/NF                                                       | 500                                       | 419                   | 1 M KOH + seawater | 1         |
|                                                                    | 1000                                      | 460                   | 1 M KOH + seawater |           |
| NiFeO-CeO <sub>2</sub> /NF                                         | 500                                       | 338                   | 1 M KOH + seawater | 2         |
|                                                                    | 1000                                      | 408                   | 1 M KOH + seawater |           |
| Ni <sub>3</sub> S <sub>2</sub> /Co <sub>3</sub> S <sub>4</sub> /NF | 500                                       | 440                   | 1 M KOH + seawater | 3         |
| S-Ni/Fe(OOH)/NF                                                    | 100                                       | 300                   | 1 M KOH + seawater | 4         |
|                                                                    | 500                                       | 398                   | 1 M KOH + seawater |           |
| Ni <sub>2</sub> P-Fe <sub>2</sub> P/NF                             | 100                                       | 305                   | 1 M KOH + seawater | 5         |
|                                                                    | 1000                                      | 431                   | 1 M KOH + seawater |           |
| Cr-CoCH/NF                                                         | 100                                       | 394                   | 1 M KOH + seawater | 6         |
| NiMoN@NiFeN/NF                                                     | 500                                       | 369                   | 1 M KOH + seawater | 7         |
| Fe-NiS/NF                                                          | 500                                       | 377                   | 1 M KOH + seawater | 8         |
|                                                                    | 1000                                      | 420                   | 1 M KOH + seawater |           |
| Ni(OH) <sub>2</sub> -TCNQ/GP                                       | 100                                       | 382                   | 1 M KOH + seawater | 9         |
| Ir@NiFe-MOF/NF                                                     | 1000                                      | 500                   | 1 M KOH + seawater | 10        |
| NiCoHPi@Ni <sub>3</sub> N/NF                                       | 500                                       | 474                   | 1 M KOH + seawater | 11        |
| (Ni/Fe/Mo)OOH/NF                                                   | 500                                       | 520                   | 1 M KOH + seawater | 12        |

|                             |     |     |                       |    |
|-----------------------------|-----|-----|-----------------------|----|
| NiSe <sub>2</sub> @NiOOH/NF | 100 | 360 | 1 M KOH +<br>seawater | 13 |
|                             | 500 | 460 | 1 M KOH +<br>seawater |    |

**Table S3.** Element analysis of  $\text{SiF}_6^{2-}$ -NiFe LDH/NF after stability test by ICP-MS.

| Element | Element concentration<br>(ppm) |
|---------|--------------------------------|
| Ni      | 0.034                          |
| Fe      | 0.075                          |
| Si      | 0.005                          |

**Table S4.** Element analysis of NiFe LDH/NF after stability test by ICP-MS.

| Element | Element concentration<br>(ppm) |
|---------|--------------------------------|
| Ni      | 0.045                          |
| Fe      | 0.097                          |



## References

- 1 R. Andaveh, A. S. Rouhaghdam, J. Ai, M. Maleki, K. Wang, A. Seif, G. B. Darband and J. Li, *Appl. Catal. B Environ.*, 2023, **325**, 122355.
- 2 H. Zhang, Z. Bi, P. Sun, A. Chen, T. Wågberg, X. Hu, X. Liu, L. Jiang and G. Hu, *ACS Nano*, 2023, **17**, 16008–16019.
- 3 C. Wang, M. Zhu, Z. Cao, P. Zhu, Y. Cao, X. Xu, C. Xu and Z. Yin, *Appl. Catal. B Environ.*, 2021, **291**, 120071.
- 4 L. Yu, L. Wu, B. McElhenny, S. Song, D. Luo, F. Zhang, Y. Yu, S. Chen and Z. Ren, *Energy Environ. Sci.*, 2020, **13**, 3439–3446.
- 5 L. Wu, L. Yu, F. Zhang, B. McElhenny, D. Luo, A. Karim, S. Chen and Z. Ren, *Adv. Funct. Mater.*, 2021, **31**, 2006484.
- 6 M. Zhang, X. He, K. Dong, H. Zhang, Y. Yao, C. Yang, M. Yue, S. Sun, Y. Sun, D. Zheng, Y. Luo, Q. Liu, N. Li, B. Tang, J. Liu and X. Sun, *Chem. Commun.*, 2023, **59**, 9750–9753.
- 7 L. Yu, Q. Zhu, S. Song, B. McElhenny, D. Wang, C. Wu, Z. Qin, J. Bao, Y. Yu, S. Chen and Z. Ren, *Nat. Commun.*, 2019, **10**, 5106.
- 8 C. Yang, K. Dong, L. Zhang, X. He, J. Chen, S. Sun, M. Yue, H. Zhang, M. Zhang, D. Zheng, Y. Luo, B. Ying, Q. Liu, A. M. Asiri, M. S. Hamdy and X. Sun, *Inorg. Chem.*, 2023, **62**, 7976–7981.
- 9 L. Zhang, J. Wang, P. Liu, J. Liang, Y. Luo, G. Cui, B. Tang, Q. Liu, X. Yan, H. Hao, M. Liu, R. Gao and X. Sun, *Nano Res.*, 2022, **15**, 6084–6090.
- 10 J. Yang, Y. Wang, J. Yang, Y. Pang, X. Zhu, Y. Lu, Y. Wu, J. Wang, H. Chen, Z. Kou, Z. Shen, Z. Pan and J. Wang, *Small*, 2022, **18**, 2106187.
- 11 H. Sun, J. Sun, Y. Song, Y. Zhang, Y. Qiu, M. Sun, X. Tian, C. Li, Z. Lv and L. Zhang, *ACS Appl. Mater. Interfaces*, 2022, **14**, 22061–22070.
- 12 L. Xu, Y. Dong, W. Xu and W. Zhang, *Catalysts*, 2023, **13**, 924.
- 13 H. Zhang, X. He, K. Dong, Y. Yao, S. Sun, M. Zhang, M. Yue, C. Yang, D. Zheng, Q. Liu, Y. Luo, B. Ying, S. Alfaifi, X. Ji, B. Tang and X. Sun, *Mater. Today Phys.*, 2023, **38**, 101249.
